# Supplementary material for: Multiple sorption cycles evaluation of cadmium oxide–alkali metal halide mixtures for pre-combustion CO2 capture
Source: Royal Society of Chemistry journal article supplement (doi:10.1039/c3ta15131j), 2014-01-01
Supplement: c3ta15131j1.pdf [file c3ta15131j1.pdf]

## SUPPLEMENTARY MATERIAL

### Multiple sorption cycles evaluation of cadmium oxide/alkali metal halide mixtures for pre-combustion CO<sub>2</sub> capture

Christian Vogt, Gregory P Knowles and Alan L Chaffee

Cooperative Research Centre for Greenhouse Gas Technologies (CO2CRC), School of Chemistry, Monash University, Box 23, VIC 3800, Australia

#### 1 Pore size distribution of SBA-15

The nitrogen physisorption experiment at 77 K on the SBA-15 sample used in this study was performed on a Coulter Omnisorp 360CX gas sorption analyser. The isotherm and the pore size distribution calculated by the BJH method are given in Figure A. The BET surface area, determined between 0.05 and 0.35 relative pressures, was determined to be 974.8 m<sup>2</sup>/g.

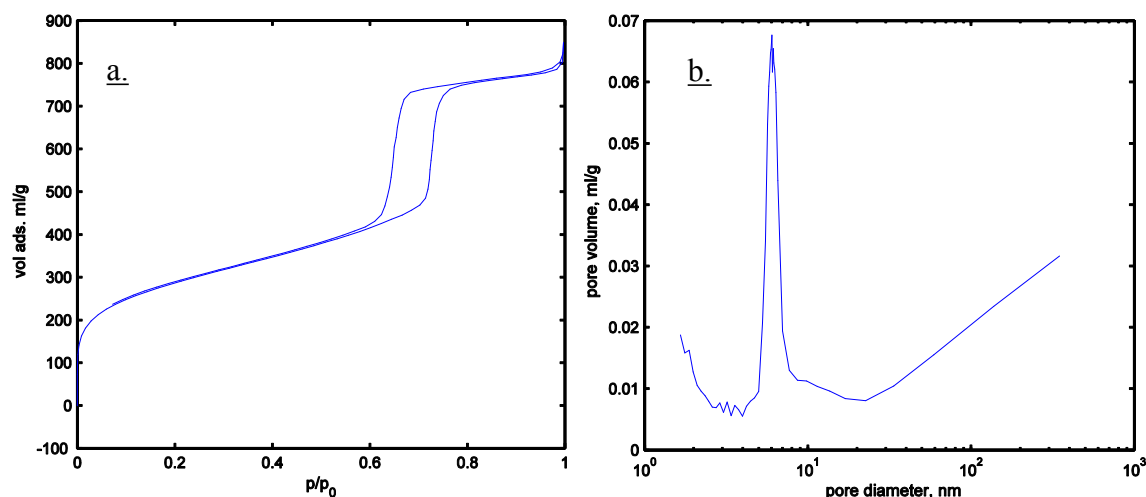

Figure A: a. N<sub>2</sub> adsorption isotherm, b. BJH pore volume for SBA-15.

#### 2 TGA cyclic experiments plots

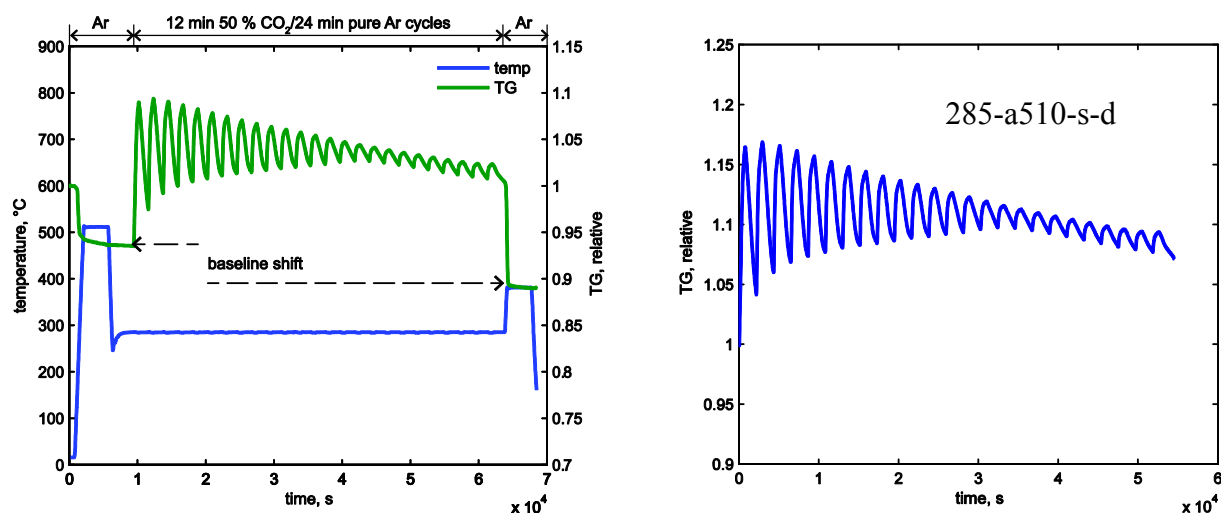

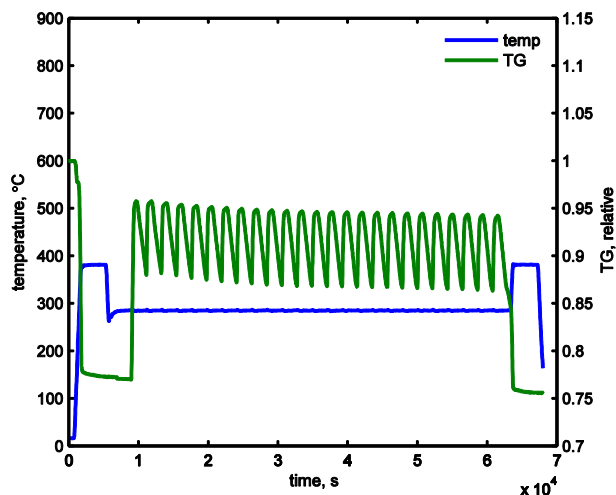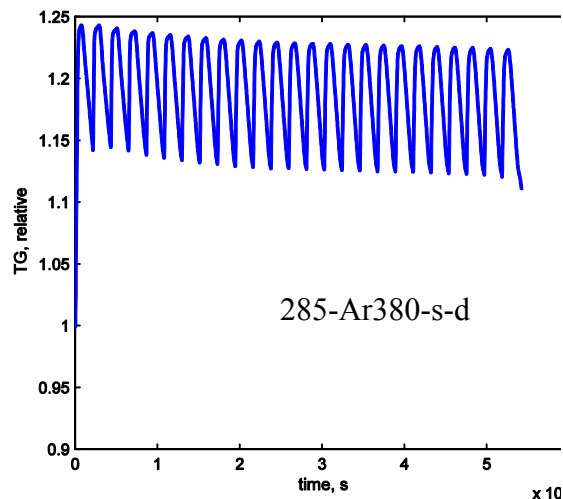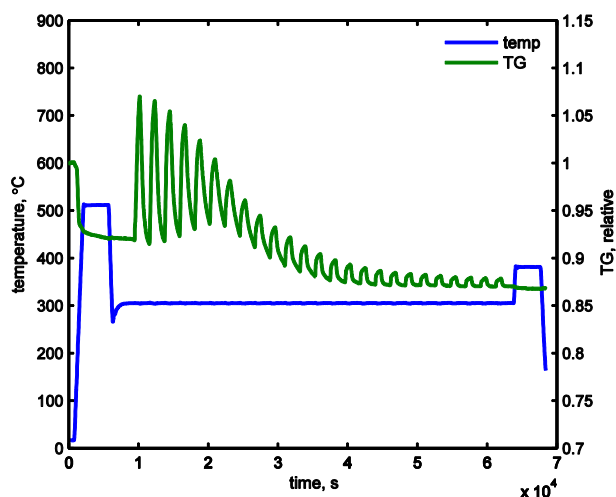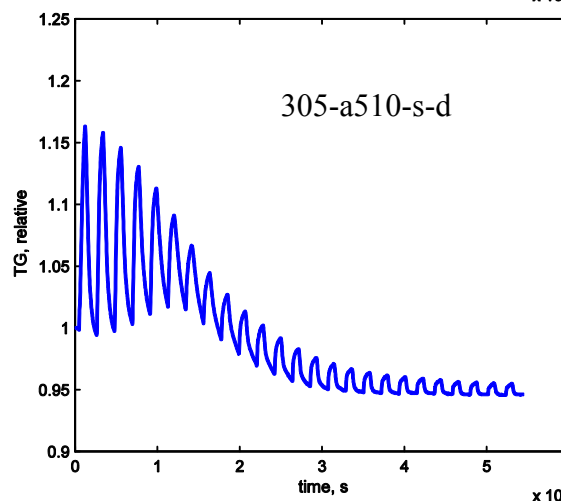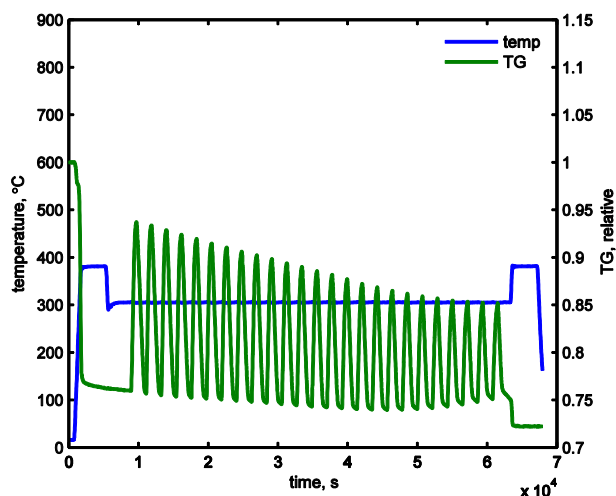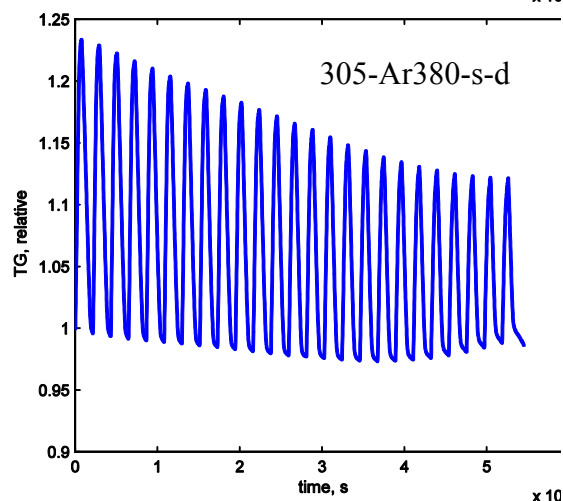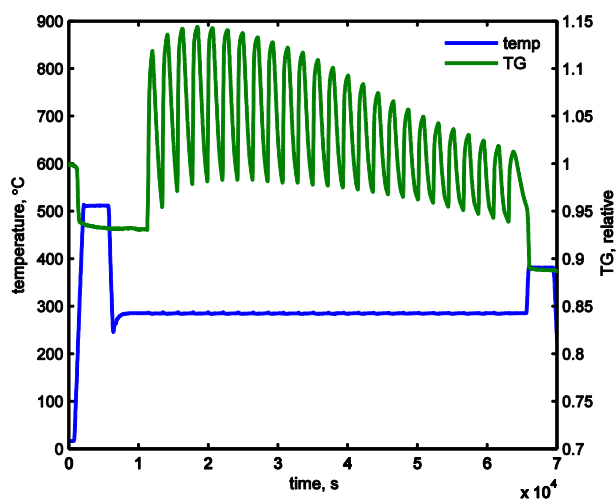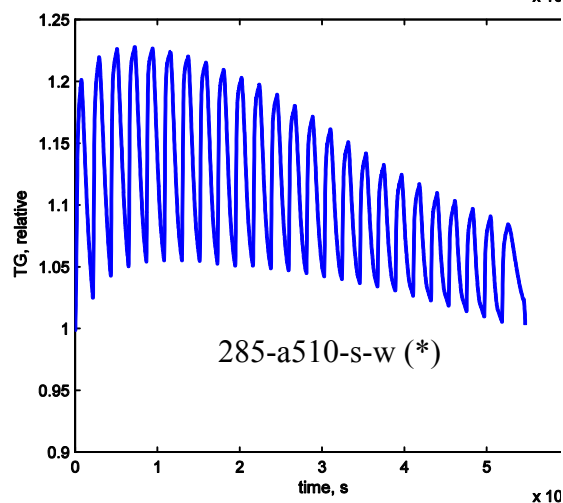

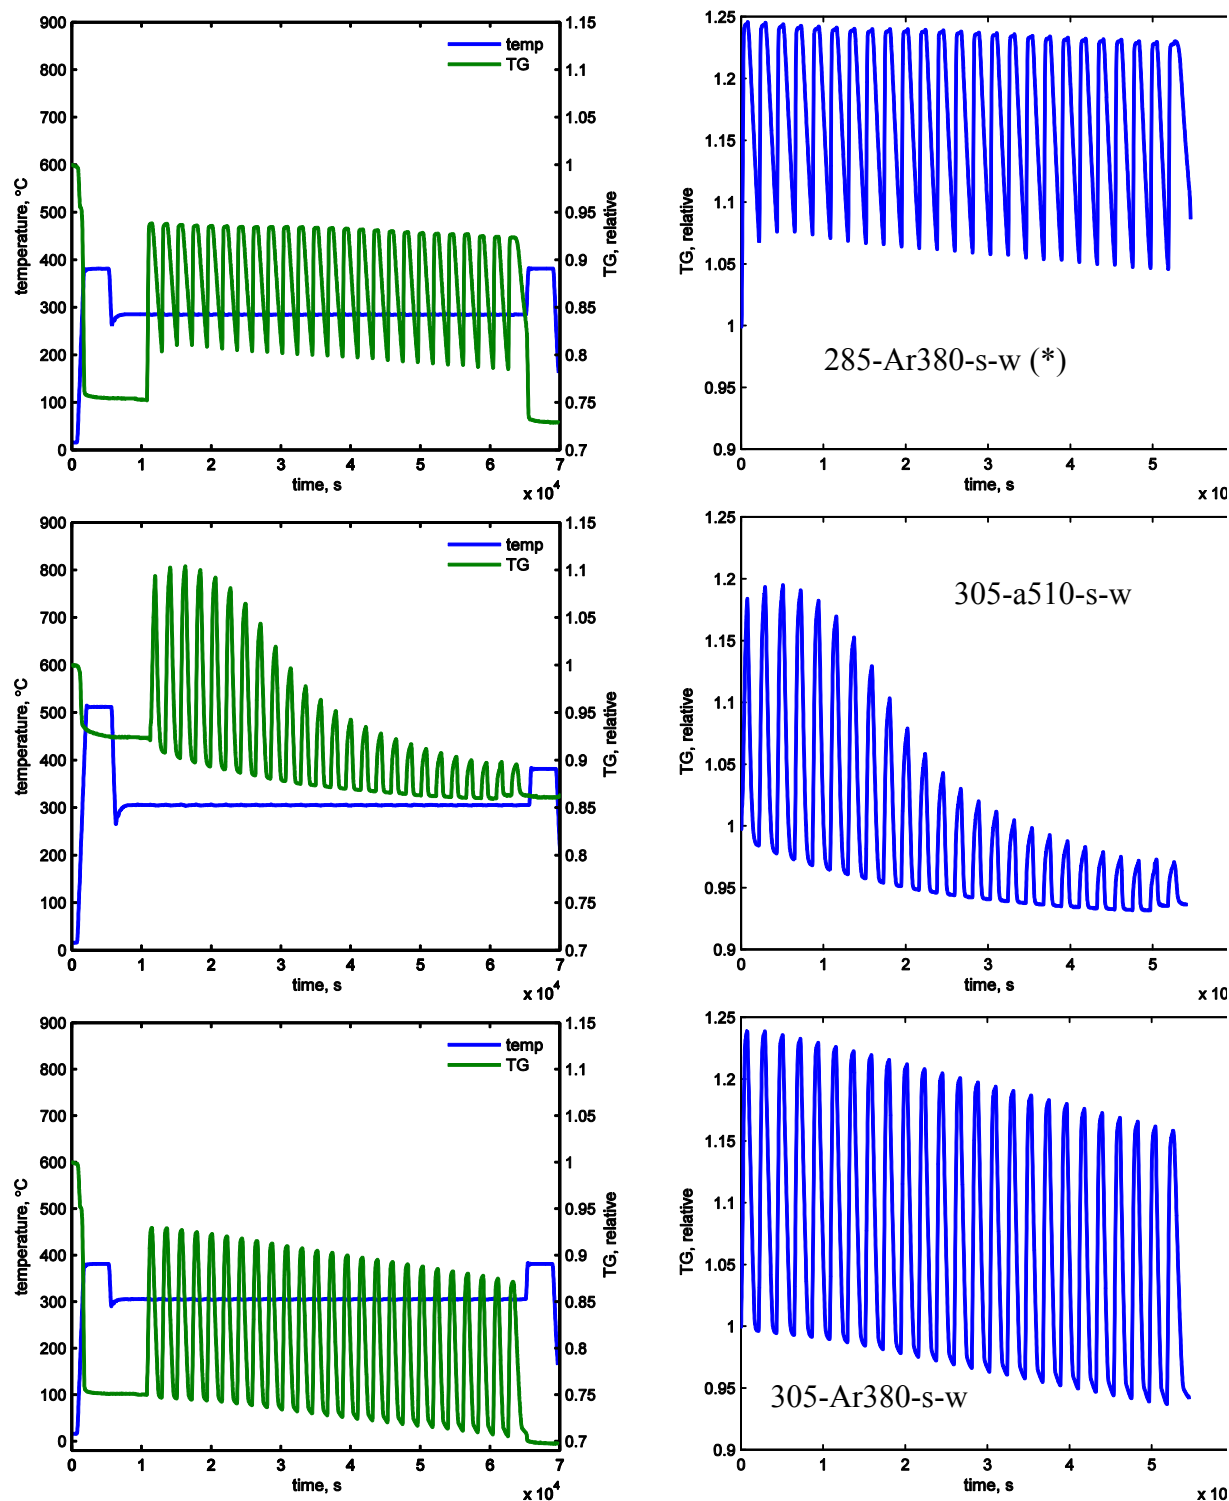

Figure B: Full thermograms (left) and normalised thermograms to 100 % active sorbent (right) of multicyclic sorption-desorption of Cd-NaI (17.5 %) sorbent at constant temperatures (275 and 295 °C) in dry and wet gas. Refer to Table 1 in the main article for sample labels. Starred (\*) sample thermograms appear in full in main article as well.

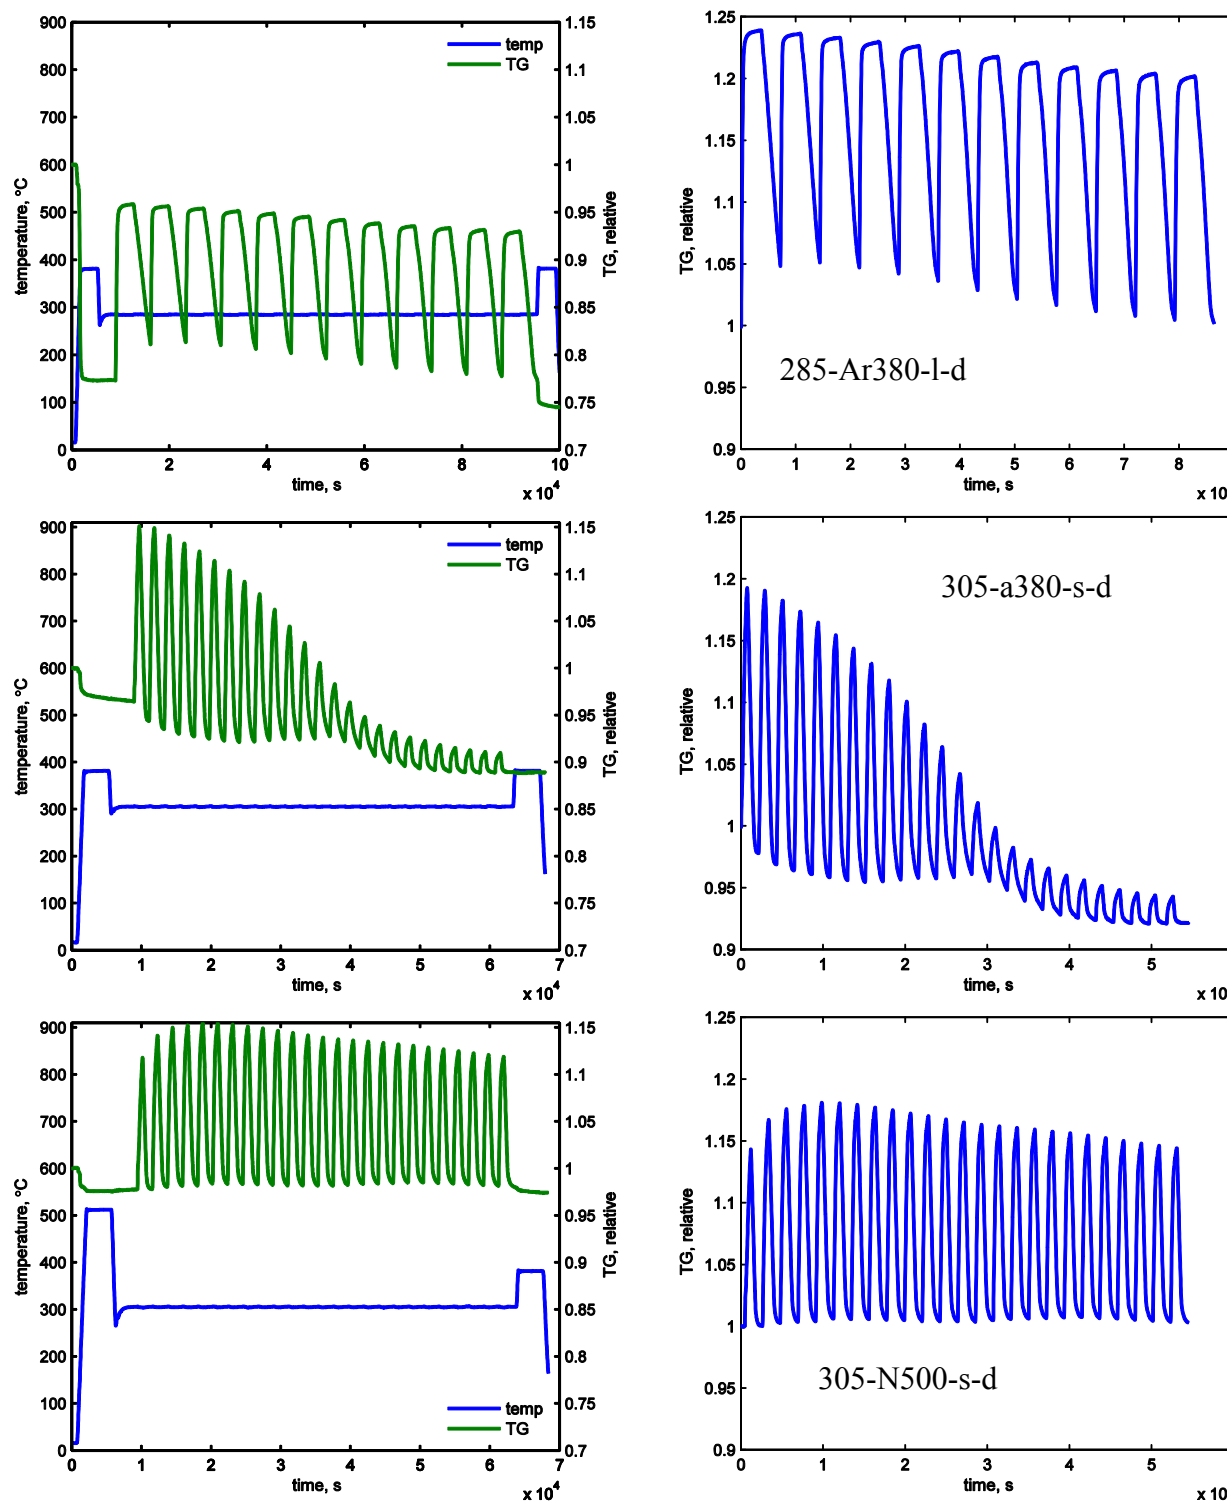

Figure C: Full thermograms (left) and normalised thermograms to 100 % active sorbent (right) of multicyclic sorption-desorption of Cd-NaI (17.5 %) sorbent at constant temperatures (275 and 295 °C) in dry gas, comparing different pre-treatments, as well as short and long cycles. Refer to Table 1 in the main article for sample labels.

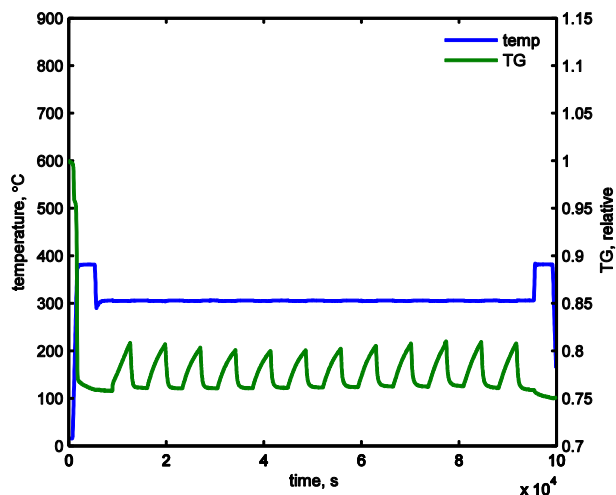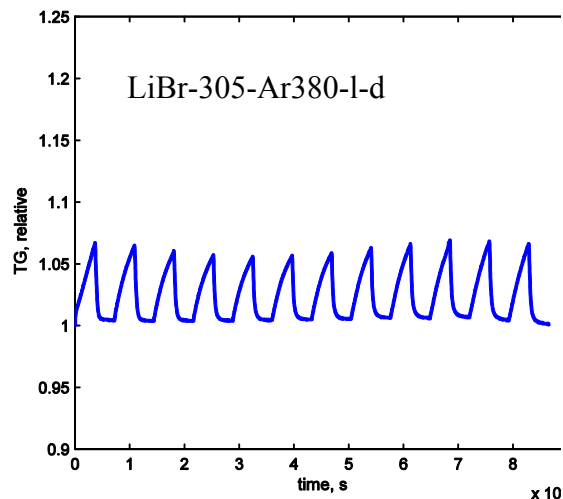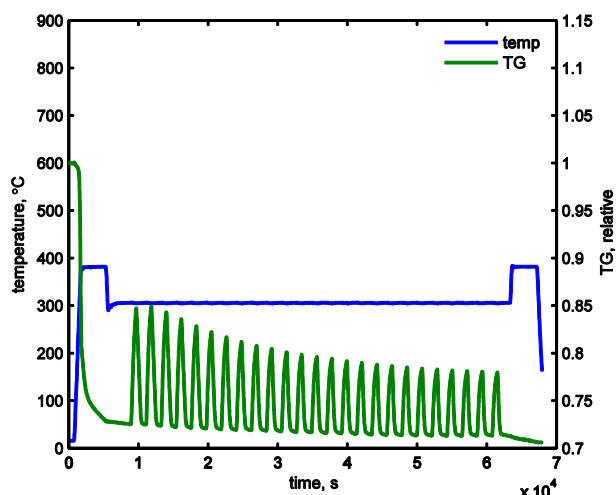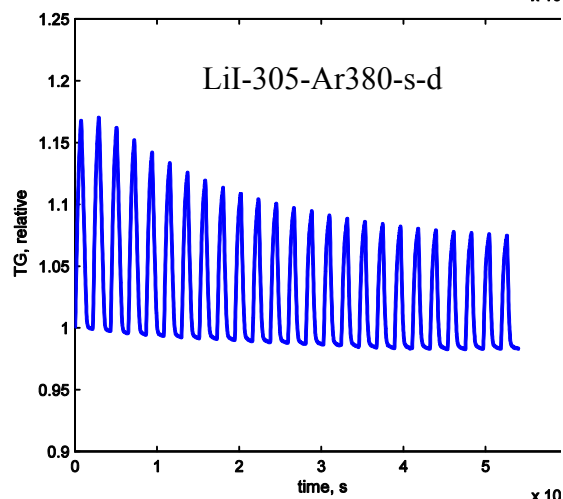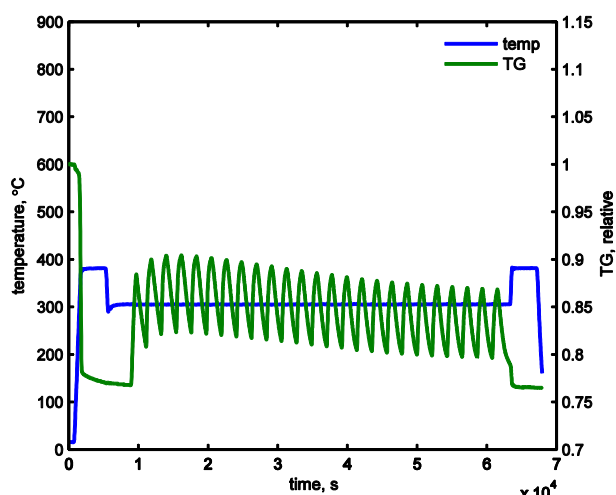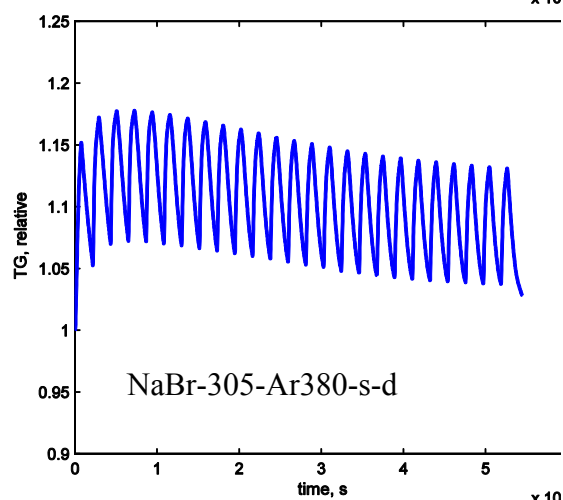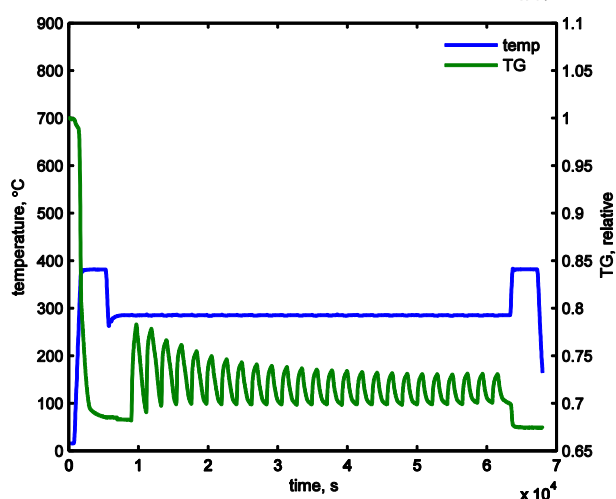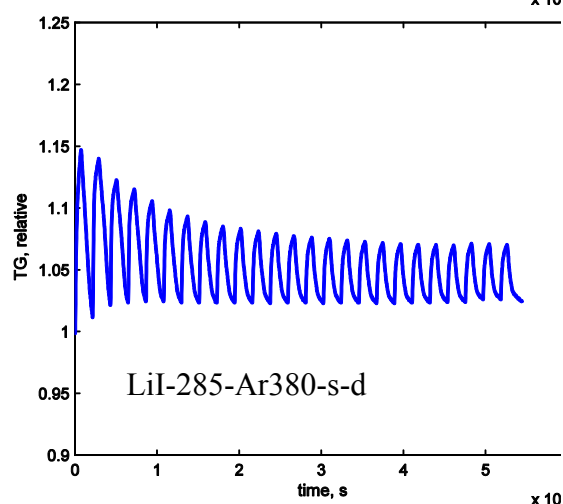

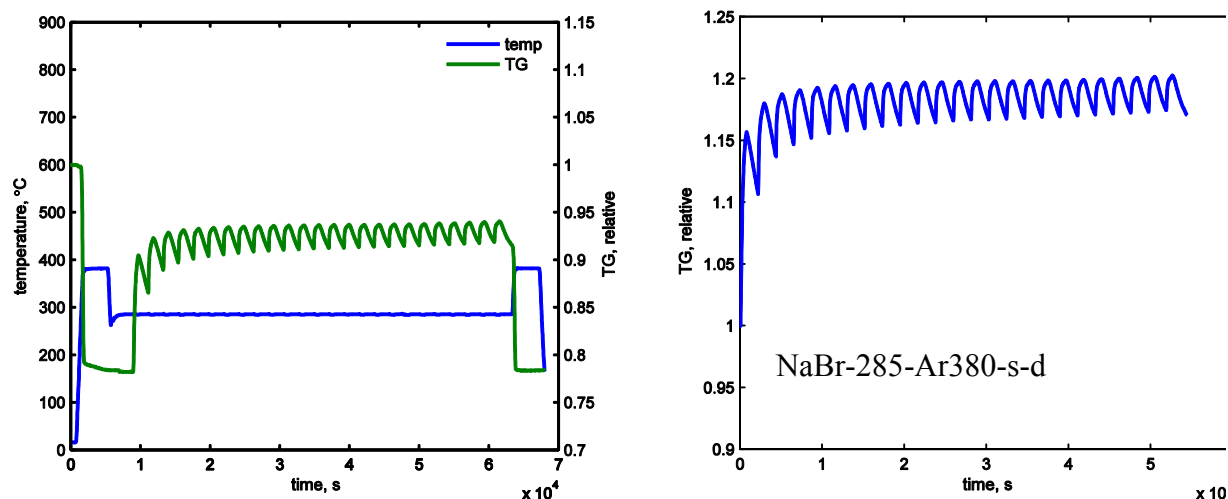

Figure D: Full thermograms (left) and normalised thermograms to 100 % active sorbent (right) of multicyclic sorption-desorption of Cd sorbent with different alkali promoters at constant temperatures (275 and 295 °C) in dry gas, comparing short and long cycles. Refer to Table 1 in the main article for sample labels.

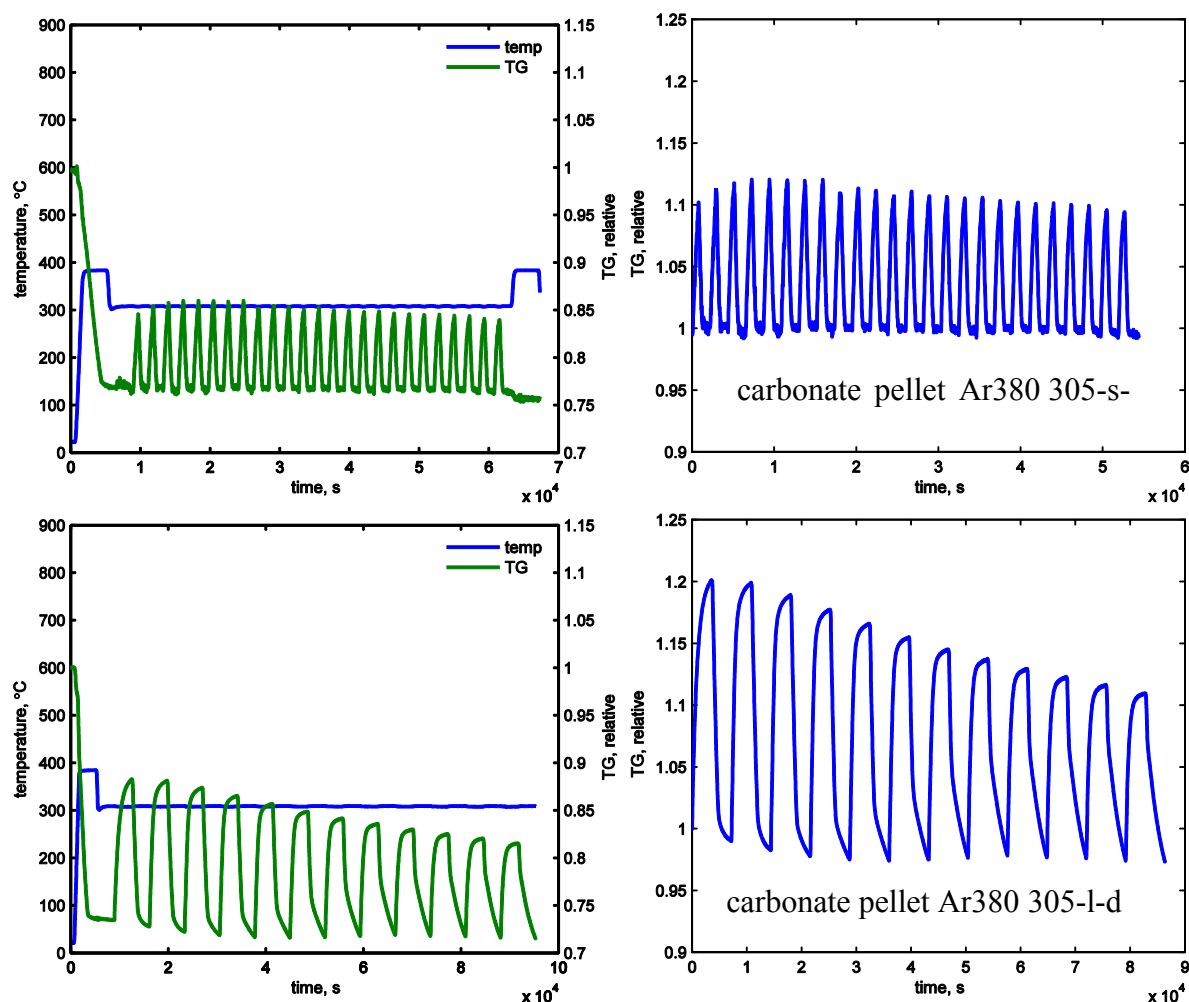

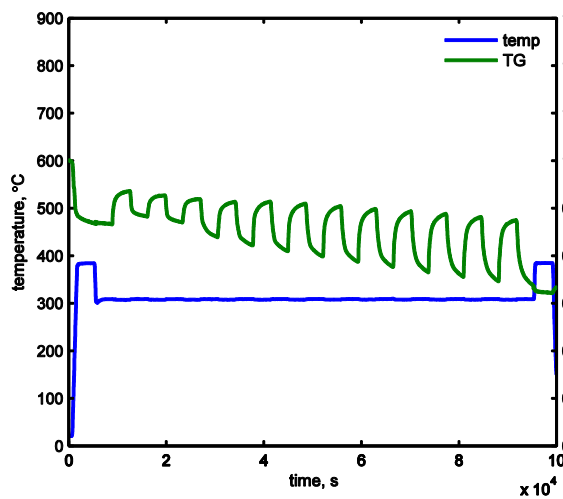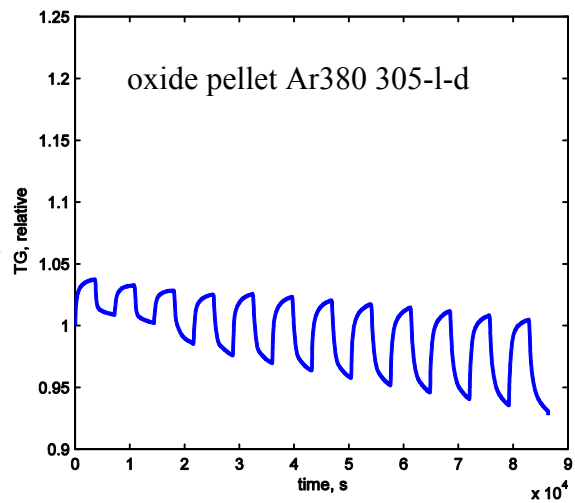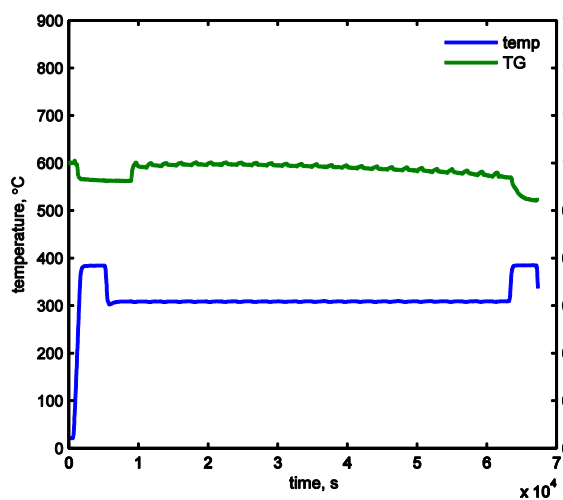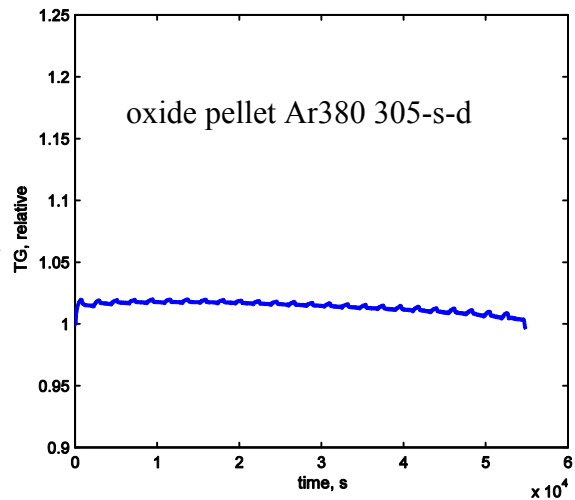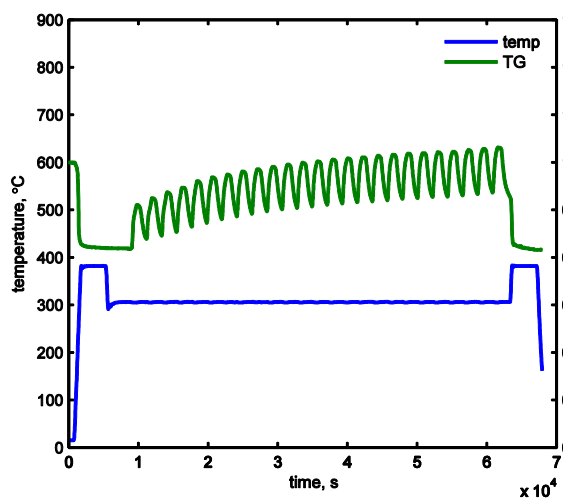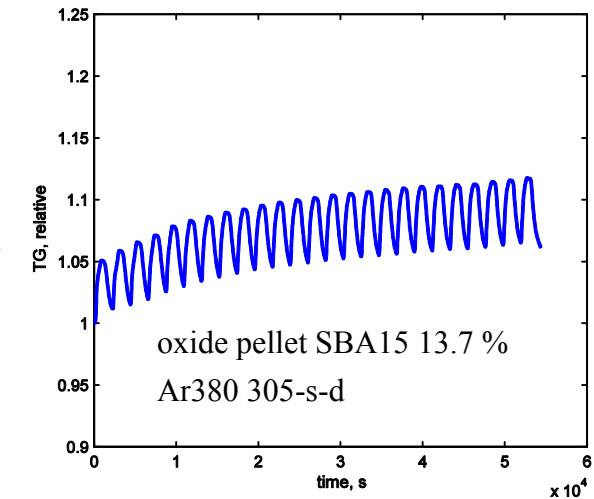

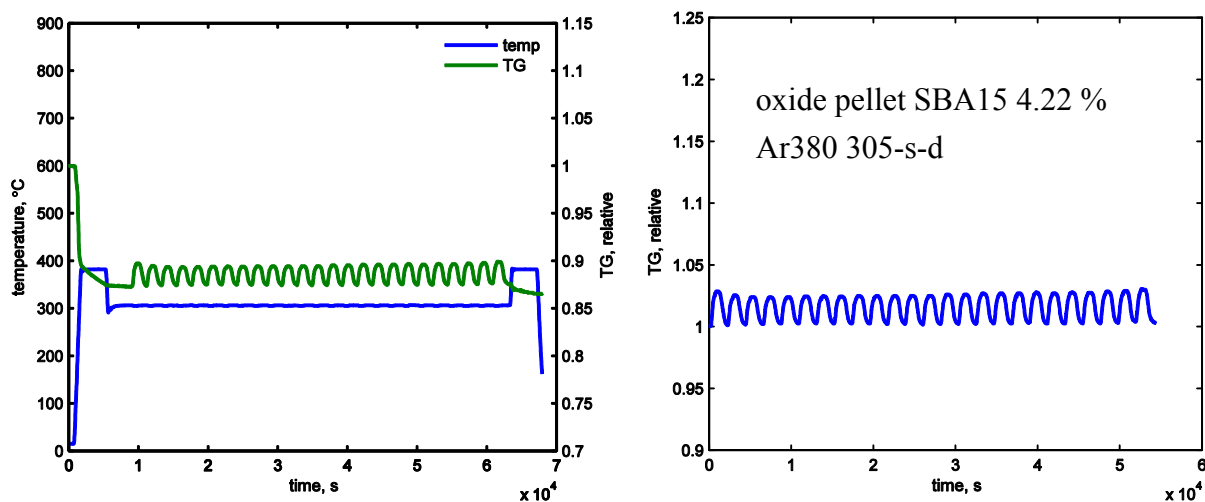

Figure E: Full thermograms (left) and normalised thermograms to 100 % active sorbent (right) of multicyclic sorption-desorption of pelletised Cd-17.5 % NaI sorbent at constant temperature (295 °C) in dry gas, comparing short and long cycles. Refer to Table 1 in the main article for sample labels.

### 3 Le Bail fit of the powder XRD data

#### 3.1 Results

The unit cell sized obtained by Le Bail refinement are given in Table A.

Table A: Results of the Le Bail refinement of the synchrotron XRD data (refer Figure 6) for cadmium oxide and carbonate

| sample                        | phase             | unit cell lengths a = b | unit cell length c | space group |
|-------------------------------|-------------------|-------------------------|--------------------|-------------|
| decarbonated cycle #3         | CdO               | 4.7121 Å                | = a                | Fm-3m       |
| carbonated cycle #3           | CdO               | 4.7125 Å                | = a                | Fm-3m       |
| PDF 4+ 2011 entry 04-001-3770 | CdO               | 4.6951 Å                | = a                | Fm-3m       |
| carbonated cycle #3           | CdCO <sub>3</sub> | 4.9207 Å                | 16.4269 Å          | R-3c        |
| PDF 4+ 2011 entry 04-014-4823 | CdCO <sub>3</sub> | 4.9207 Å                | 16.2968 Å          | R-3c        |

#### 3.2 Statistics

The statistical values of the Le Bail fits performed in the paper are given in Table B.

Table B: Statistics of the Le Bail fits

| sample                    | reference  | reference in supplement | $wRp$  | $Rp$   | $\chi^2$ |
|---------------------------|------------|-------------------------|--------|--------|----------|
| LaB <sub>6</sub> standard | text/paper | Figure E                | 0.0396 | 0.0332 | 3.337    |
| 17.5 % NaI decarb.        | Table A    | Figure F                | 0.0882 | 0.0544 | 13.80    |
| carbonated cycle #3       | Table A    | Figure G                | 0.1042 | 0.0608 | 21.14    |



### 3.3 Le Bail fit graphs

The graphs of the Le Bail refinements of the powder XRD data are given in the figures below. The black crosses denote the observed, the red line the refined data. The background is plotted green; blue denotes the difference between calculated and observed. The difference graph is offset below the other graphs.

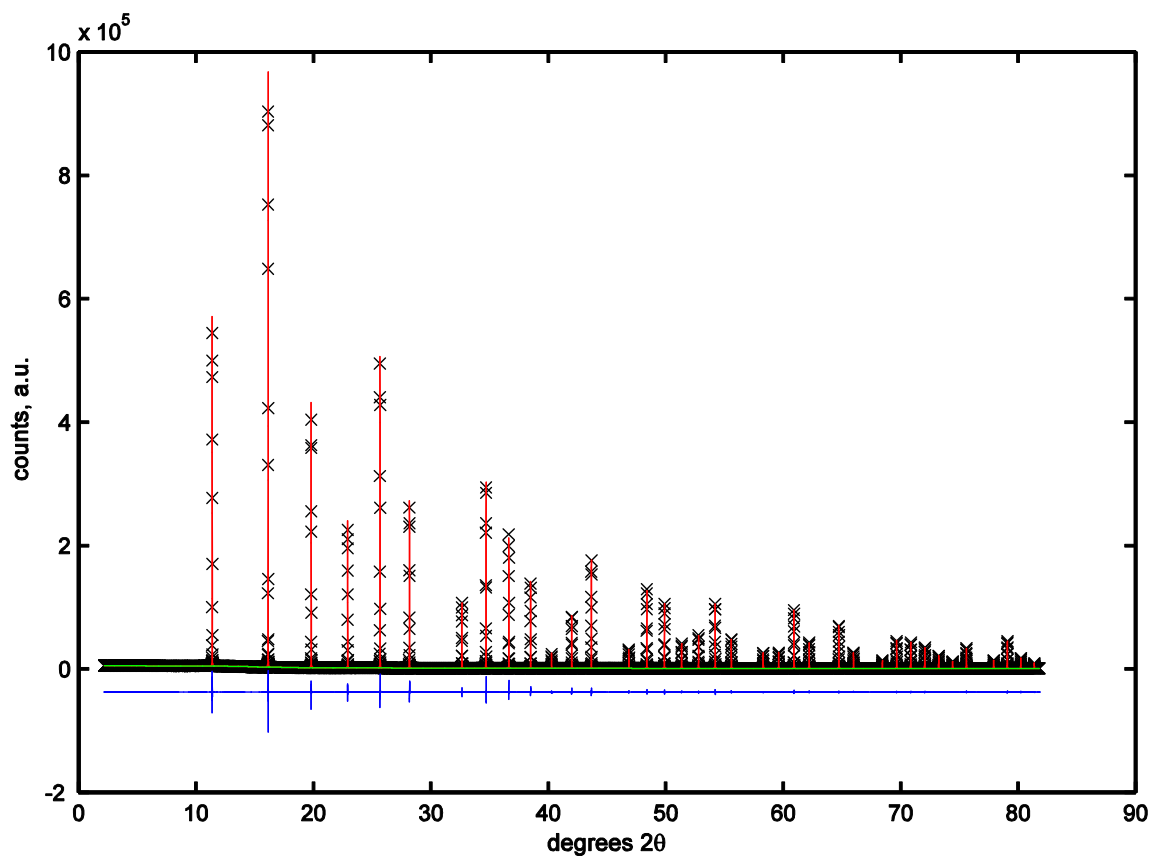

Figure F: Le Bail refinement plot of LaB<sub>6</sub> standard, synchrotron

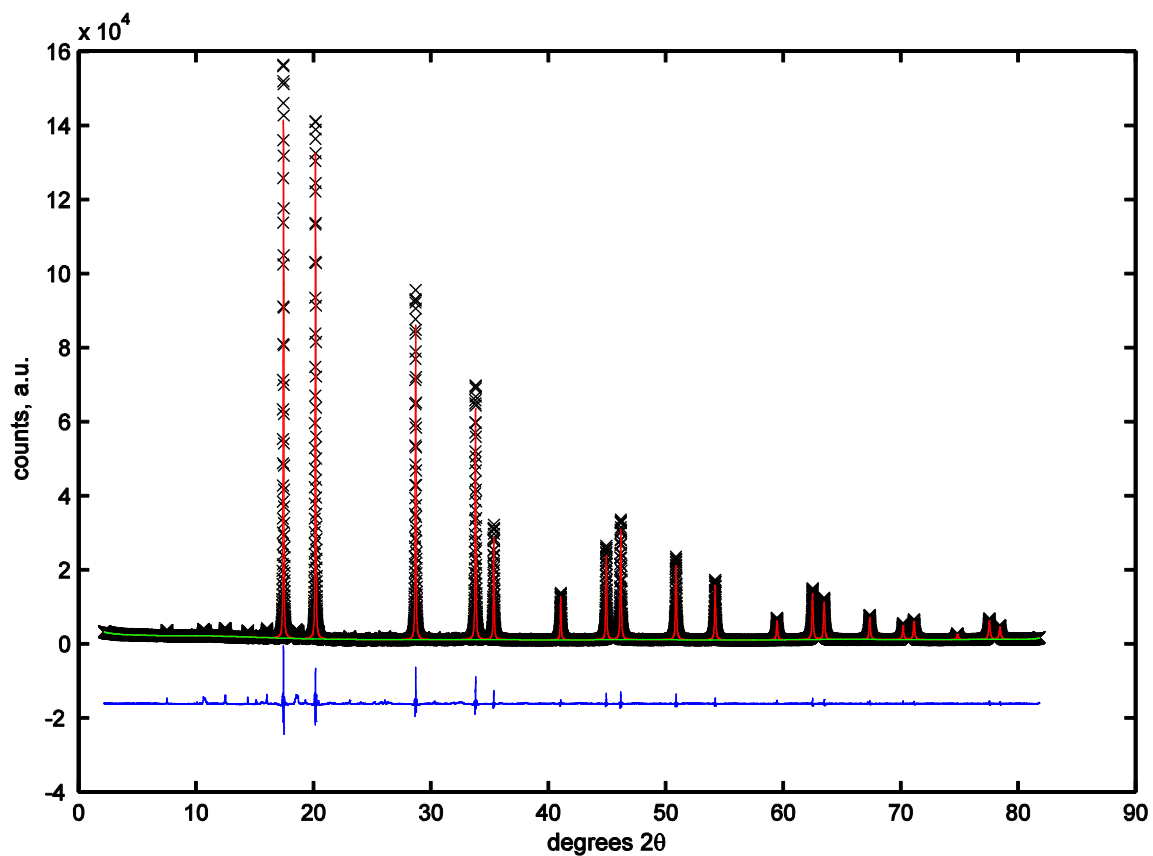

Figure G: Le Bail refinement plot of 17.5 % NaI sample, decarbonated in situ in 3<sup>rd</sup> cycle, synchrotron

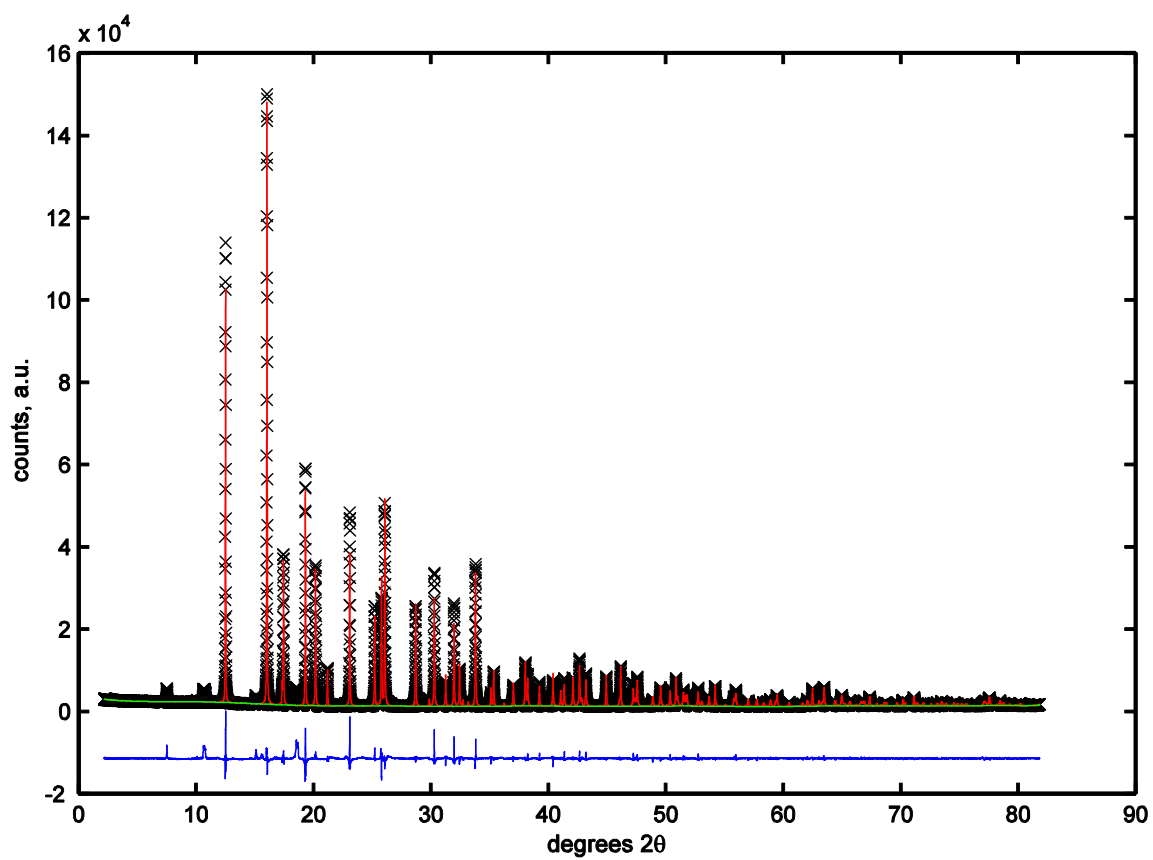

Figure H: Le Bail refinement plot of 17.5 % NaI sample, carbonated in situ in 3<sup>rd</sup> cycle, synchrotron
